# Supplementary material for: Conventional CD4+ T cells present bacterial antigens to induce cytotoxic and memory CD8+ T cell responses
Source: PubMed Central journal article supplement (PMC5691066; doi:10.1038/s41467-017-01661-7), 2017-11-17
Supplement: 41467_2017_1661_MOESM1_ESM.pdf [file 41467_2017_1661_MOESM1_ESM.pdf]

# Supp. Figure 1

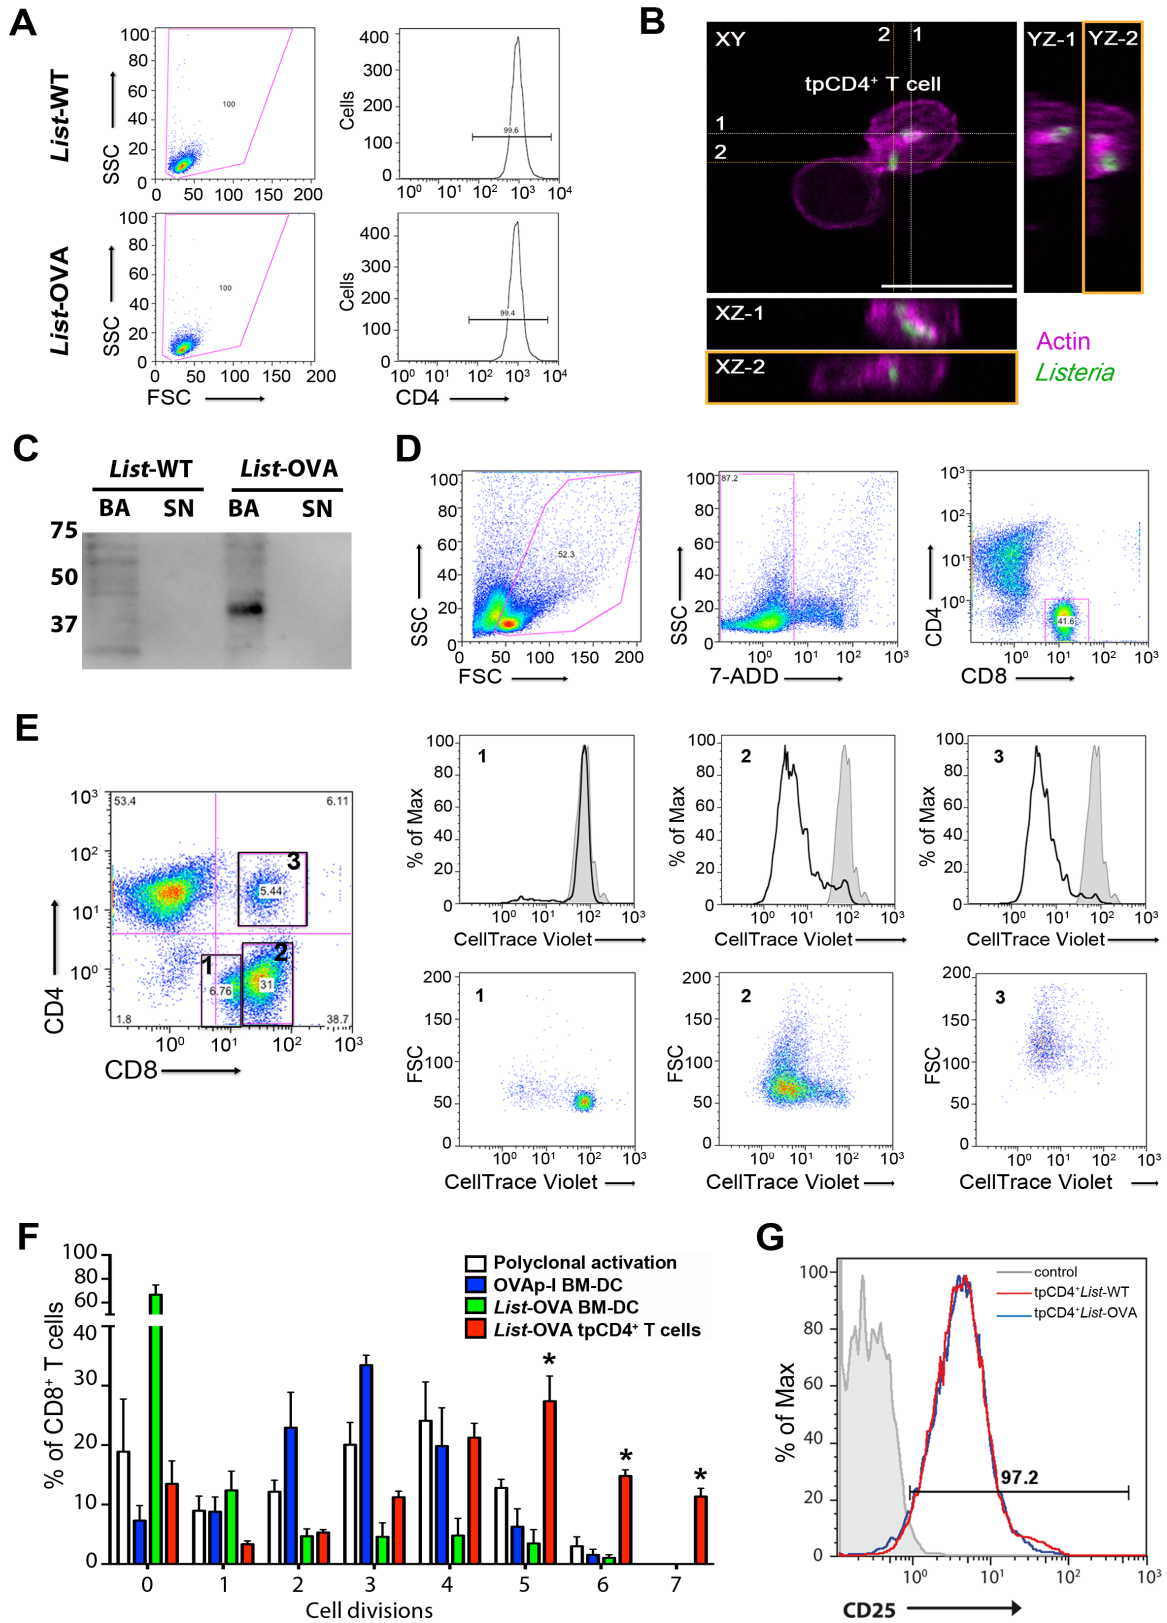

**Supplementary Figure 1.** **A**, Purity of *Listeria*-WT or *Listeria*-OVA tpCD4<sup>+</sup> T cells after cell sorting. Size and complexity are shown by plotting side- (SSC) vs forward-scattered (FSC) light (left panels). **B**, Orthogonal views of *Listeria* tpCD4<sup>+</sup> T cells purified at 3 h of conjugate formation. Actin is shown in magenta, and *Listeria* in green. XY together with YZ and XZ views (from lines marked in XY) are shown. Bar = 10  $\mu$ m. **C**, OVA, bacteria-associated (BA) or in the concentrated supernatant (SN), detected by Western blotting. Bacteria tested were *Listeria*-WT (*List*-WT) or *Listeria*-OVA (*List*-OVA). Note that all original Western-blot together with the membranes stained for molecular size markers are provided at the end of the manuscript in Supplementary Fig. 5. **D**, Gating strategy for flow cytometry analysis to measure CD8<sup>+</sup> T cell proliferation induced by tpCD4<sup>+</sup> T cells. Only viable cells (7-AAD-negative) were analyzed. CellTrace Violet staining was analyzed in the CD8<sup>+</sup> population. **E**, *Listeria*-OVA tpCD4<sup>+</sup> T were incubated with naïve OT-I CD8<sup>+</sup> T cells (72 h). CellTrace Violet staining was analyzed in three CD8-positive populations: CD8<sup>low</sup> (1), CD8<sup>high</sup> (2) and CD4<sup>+</sup>CD8<sup>+</sup> cell conjugates (3), which were also analyzed to detect blasts (activated T cells), which are larger than non-activated T cells (positive in FSC, forward scatter). **F**, Quantification of CD8<sup>+</sup> T cells proliferation after 3 days activation with anti-CD3/CD28 antibodies (polyclonal activation; white), OVAp-I-loaded BM-DC (blue), BM-DC infected with *Listeria*-OVA (green) or with *Listeria*-OVA tpCD4<sup>+</sup> T cells (red). The percentage of CD8<sup>+</sup> T cells that divided at indicated times is shown. \*  $p \leq 0.05$ ; two-way ANOVA with the Bonferroni post-test. Data shown as mean  $\pm$  SD of four independent experiments. **G**, *Listeria*-WT (red line) or *Listeria*-OVA (blue line) tpCD4<sup>+</sup> T cell activation measured by CD25 expression. CD25 levels of non-activated lymphocytes is shown in grey.

## Supp. Figure 2

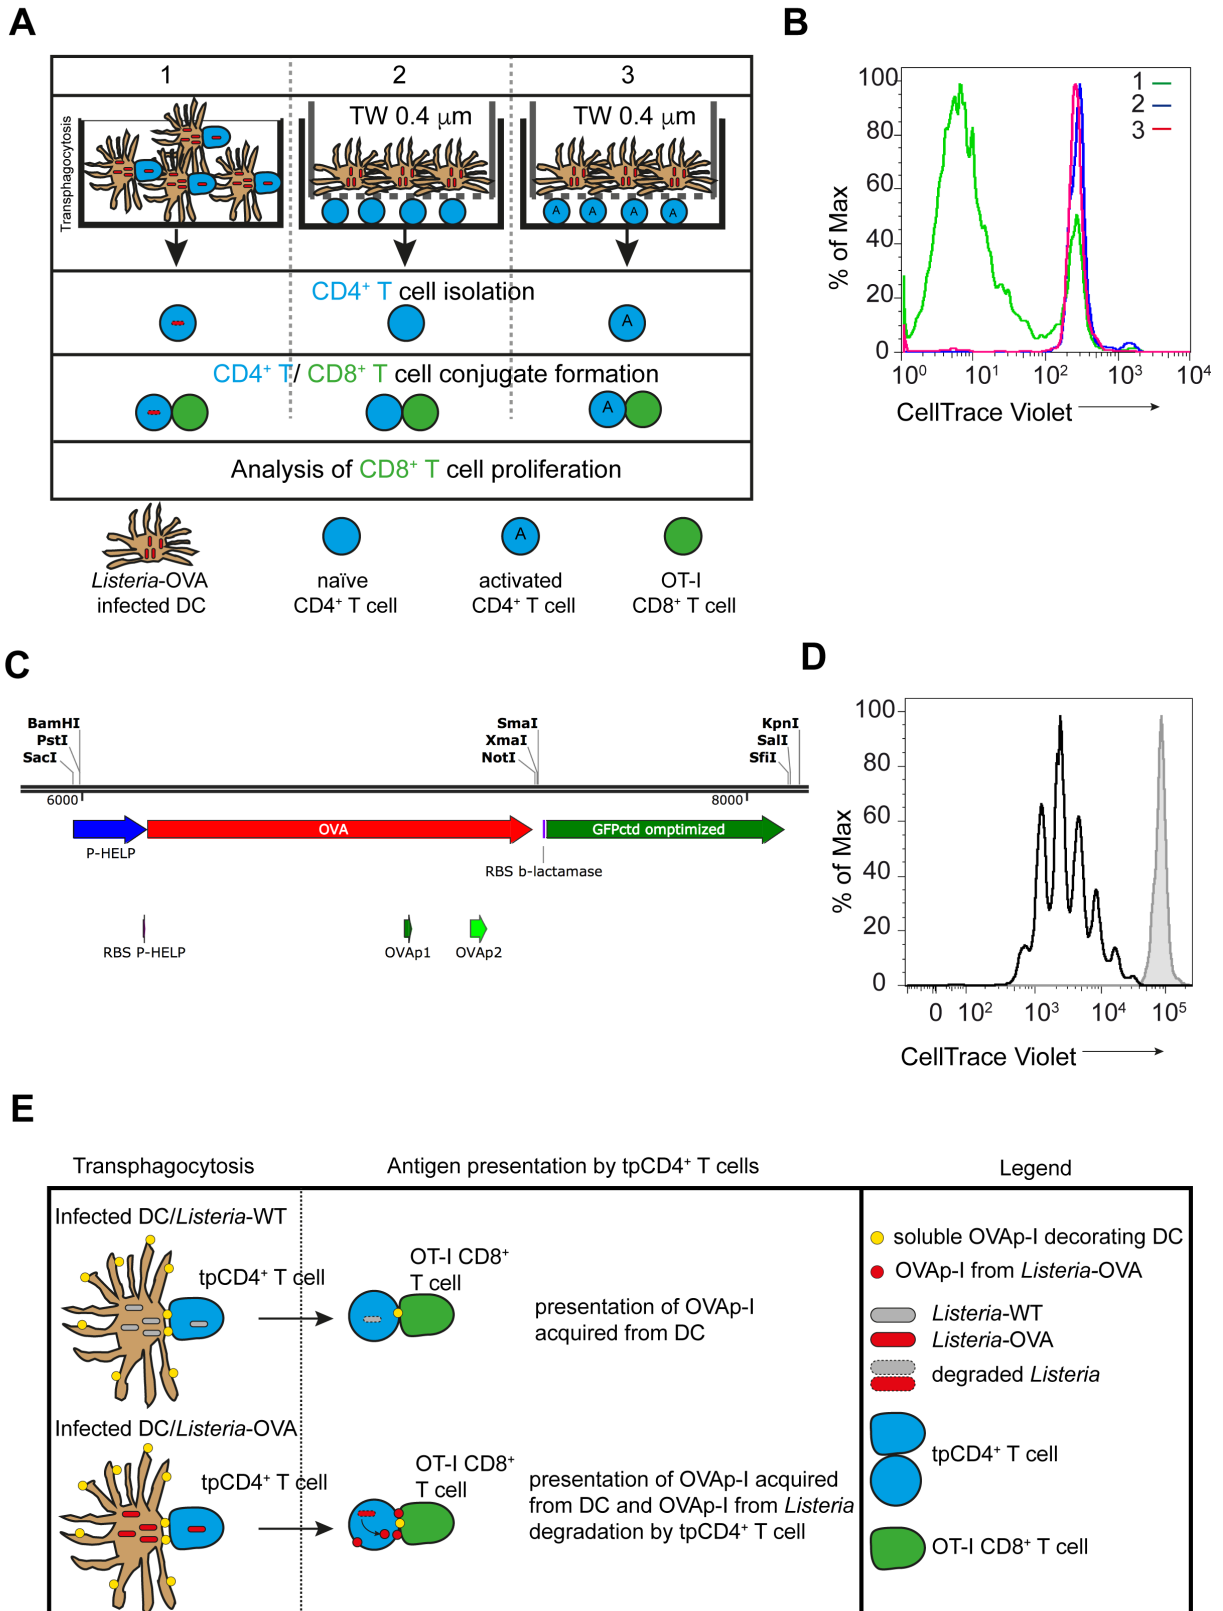

**Supplementary Figure 2.** **A**, Scheme, and **B** results of experiments to confirm the intracellular (bacteria) source of OVA. (A) *Listeria*-OVA-infected BM-DC were allowed to contact OT-II CD4<sup>+</sup> T cells (condition 1). Alternatively, *Listeria*-OVA-infected BM-DC were cultured on a polycarbonate barrier (0.4 μm pore size transwell; TW) that allowed passage of soluble material including proteins or exosomes, but impeded cell contact with non-activated (condition 2) or activated (anti-CD3/CD28; condition 3) OT-II CD4<sup>+</sup> T cells. After 16 h, CD4<sup>+</sup> T cells were re-isolated by cell sorting and used as APC to activate OT-I CD8<sup>+</sup> T cells. (B) OT-I CD8<sup>+</sup> T cell proliferation 4 days after contact with CD4<sup>+</sup> T cells as APC. Condition 1, green line; condition 2, blue line; condition 3, magenta line. **C**, OVA-GFP architecture of *Listeria*-OVA2. P-HELP promoter, RBS from each gene, OVAp (I and II) as well as the restriction enzymes allowing the removal of the genes are indicated. **D**, OT-I naïve CD8<sup>+</sup> T cell proliferation measured by CellTrace Violet staining 3 days after contact with *Listeria*-OVA2 (black line) tpCD4<sup>+</sup> T cells. Non-activated naïve CD8<sup>+</sup> T cells are shown in grey. **E**, Scheme of the experiment in Figure 2A. BM-DC were infected with *Listeria*-WT or *Listeria*-OVA and loaded with OVAp-II (to allow bacterial transphagocytosis to OT-II CD4<sup>+</sup> T cells) plus OVAp-I (the peptide that stimulates CD8<sup>+</sup> T cells from OT-I mice). OT-II CD4<sup>+</sup> T cells were incubated with these BM-DC to allow bacterial transphagocytosis; after 24 h, they were re-isolated by cell sorting and conjugated with naïve OT-I CD8<sup>+</sup> T cells. During conjugation, tpCD4<sup>+</sup> T cells might acquire MHC-I/OVAp-I from the DC membrane. If this was the main source of MHC-I/antigen that activates CD8<sup>+</sup> T cells, similar activation would be detected in both groups; if tpCD4<sup>+</sup> T cells process and present bacterial antigens via their own MHC-I, *Listeria*-OVA tpCD4<sup>+</sup> T cells would induce more potent CD8<sup>+</sup> T cell activation.

### Supp. Figure 3

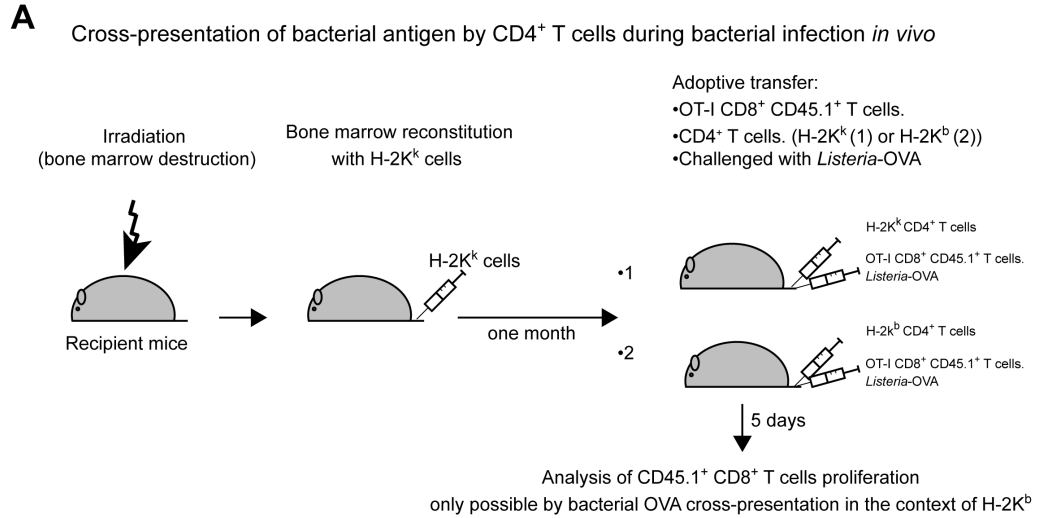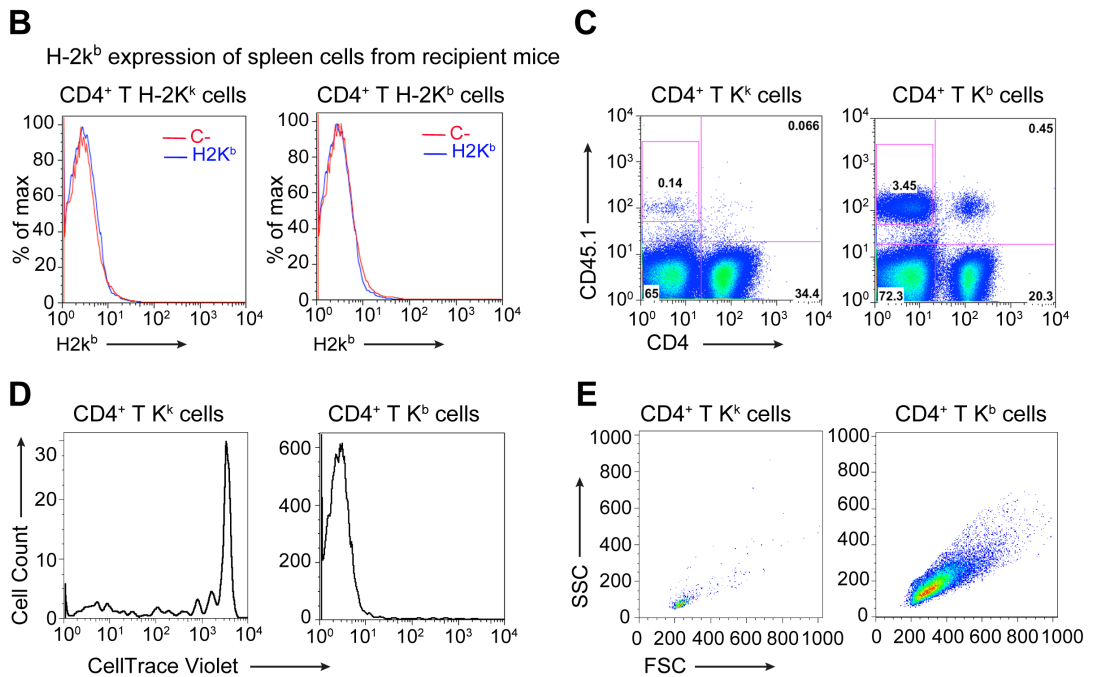

**Supplementary Figure 3. A.** Scheme of experimental approach used to determine whether CD4<sup>+</sup> T cells present bacterial antigens in the course of an *in vivo* bacterial infection, to activate naïve OT-I CD8<sup>+</sup> T cells. C57BL/6 mice were lethally irradiated and transplanted i.v. with bone marrow cells from H-2K<sup>k</sup> mice. One month later, H-2K<sup>k/k</sup> CD4<sup>+</sup> T cells (condition 1) or H-2K<sup>k/b</sup> CD4<sup>+</sup> T cells (condition 2) were adoptively transferred, together with CD8<sup>+</sup>CD45.1<sup>+</sup> T cells from

OT-I mice and with MCC peptide. Recipient mice were also infected with *Listeria*-OVA ( $10^4$  bacteria/mouse). At 5 days after infection, spleens were isolated from recipient mice and proliferation of CD8<sup>+</sup> T cells from OT-I mice (prestained with CellTrace Violet) was measured by flow cytometry. **B.** To confirm bone marrow elimination in recipient mice, we tested for H-2K<sup>b</sup> in spleen samples (CD45.1<sup>-</sup>CD4<sup>-</sup>). Red lines indicate secondary antibody background signal, blue lines indicate H-2K<sup>b</sup> expression. **C.** Dot plots showing the OT-I CD8<sup>+</sup> T cell (CD45.1<sup>+</sup>CD4<sup>-</sup>) population, analyzed 5 days after *Listeria*-OVA infection. **D.** Proliferation of the transferred OT-I CD8<sup>+</sup> T cells, 5 days after infection. **E.** Size and complexity of transferred OT-I CD8<sup>+</sup> T cells were analyzed in SSC-A and FSC-A to detect blasts (activated T cells). OT-I CD8<sup>+</sup>CD45.1<sup>+</sup> cells were clearly activated in the mouse injected with H-2K<sup>b</sup> CD4<sup>+</sup> T cells (condition 2) and not in condition 1.

## Supp. Figure 4

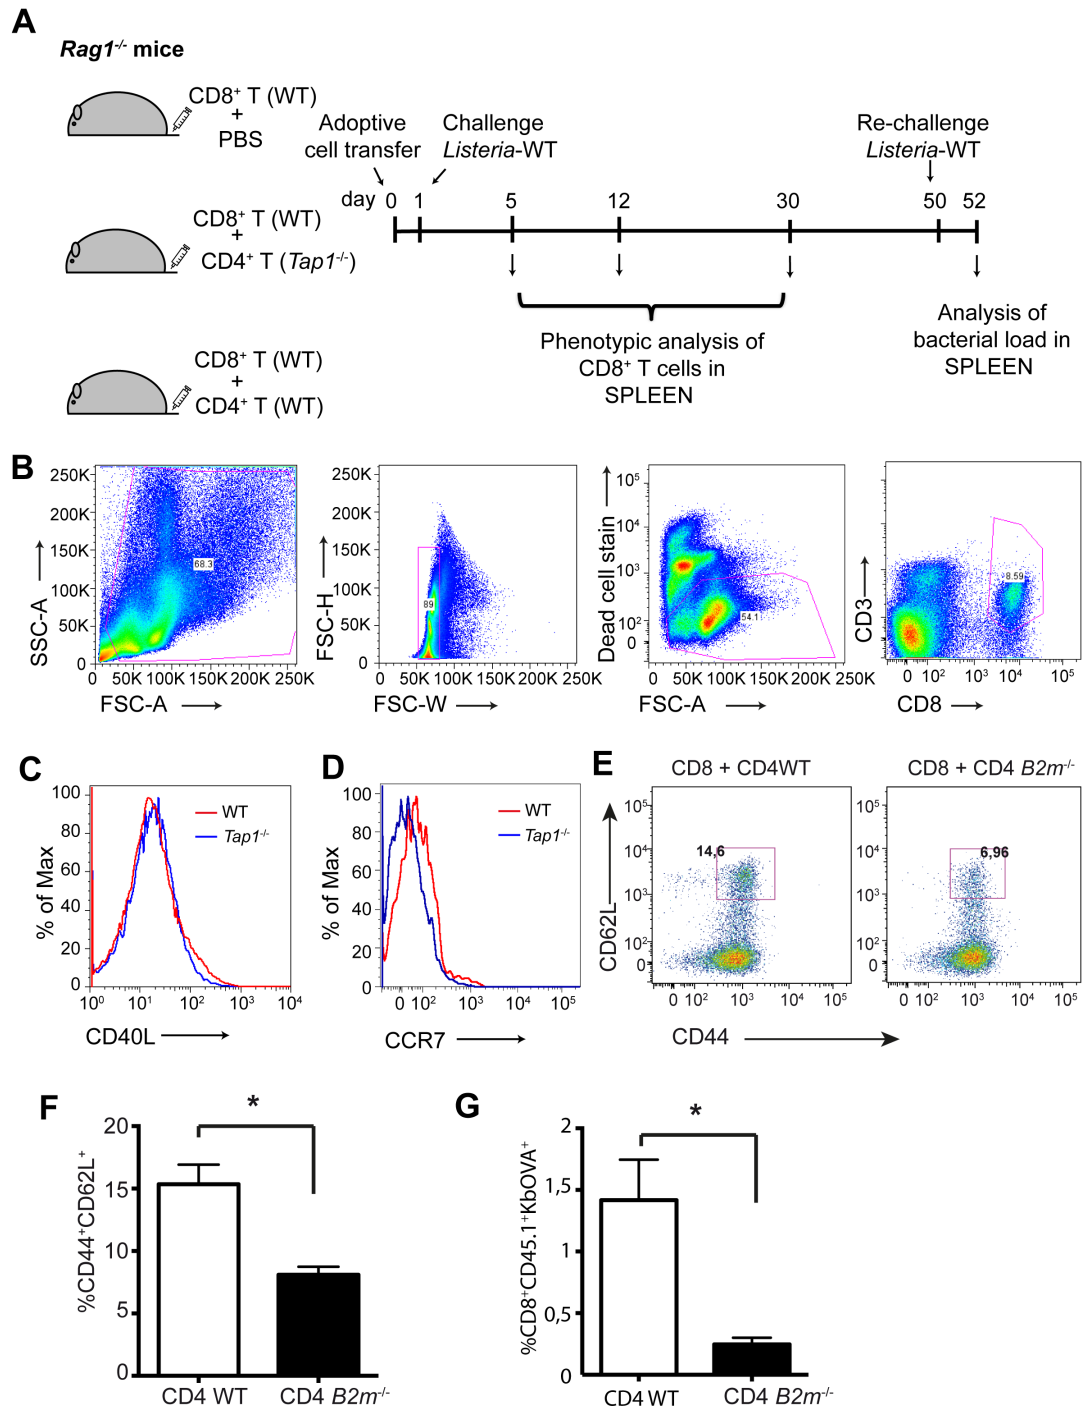

**Supplementary Figure 4.** **A**, Scheme of the experiment in Fig. 4. **B**, Gating strategy for flow cytometry analysis of memory CD8<sup>+</sup> T cells. All cells, excluding debris, were taken by size and

complexity (top left). From this selection, we gated for singlets (FSC-H vs FSC-W and SSC-H vs SSC-W) (top right, center left), then excluded dead cells (center right). Lymphocytes were analyzed by antibody staining for CD3<sup>+</sup>CD8<sup>+</sup> (bottom). **C**, CD40L expression on polyclonal activated CD4<sup>+</sup> T cells from WT (red line) and *Tap1*<sup>-/-</sup> (blue) mice. **D**, CCR-7 levels on CD3<sup>+</sup>CD8<sup>+</sup>CD44<sup>+</sup>CD62L<sup>high</sup> population from a mouse injected with CD4<sup>+</sup> WT cells (red line) or with CD4<sup>+</sup> *Tap1*<sup>-/-</sup> cells (blue line) at 30 days after *Listeria* challenge. **E-G**, Phenotypic analysis of memory CD8<sup>+</sup> T cell generation *in vivo*. *Rag1*<sup>-/-</sup> mice were adoptively transferred i.v. with WT CD4<sup>+</sup> T plus WT CD8<sup>+</sup> T cells (group 1) or with *B2m*<sup>-/-</sup> CD4<sup>+</sup> T plus WT CD8<sup>+</sup> T cells (group 2). The following day, all mice were challenged with *Listeria*-OVA2 (10<sup>3</sup> bacteria/mice; i.v.). 30 days after challenge, the CD8<sup>+</sup> T cell population from spleen was analyzed. **(E)**, Representative dot plots showing CD62L and CD44 staining gated on the CD45.1<sup>+</sup>CD8<sup>+</sup> T cell population. **(F)**, Percentage of CD62L<sup>high</sup> CD44<sup>+</sup> gated on cells indicated in E (red outline). **(G)** Percentage of CD45.1<sup>+</sup>CD8<sup>+</sup> T cells recognizing the H2-K<sup>b</sup>/SIINFELK hexamer. Data shown as mean ± SD for 3 mice/group (group 1, white; group 2, black). \* p<0.05 analyzed by unpaired t test.



## Supp. Figure 5

**A**

Original blots from figure 2 E,F

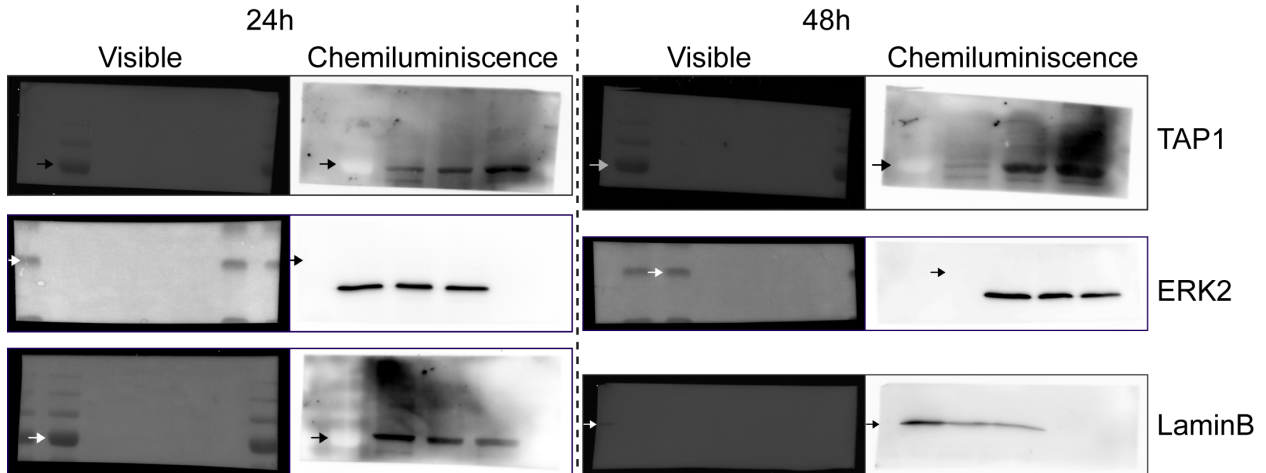

**B**

Original blots from Supp. figure 1C

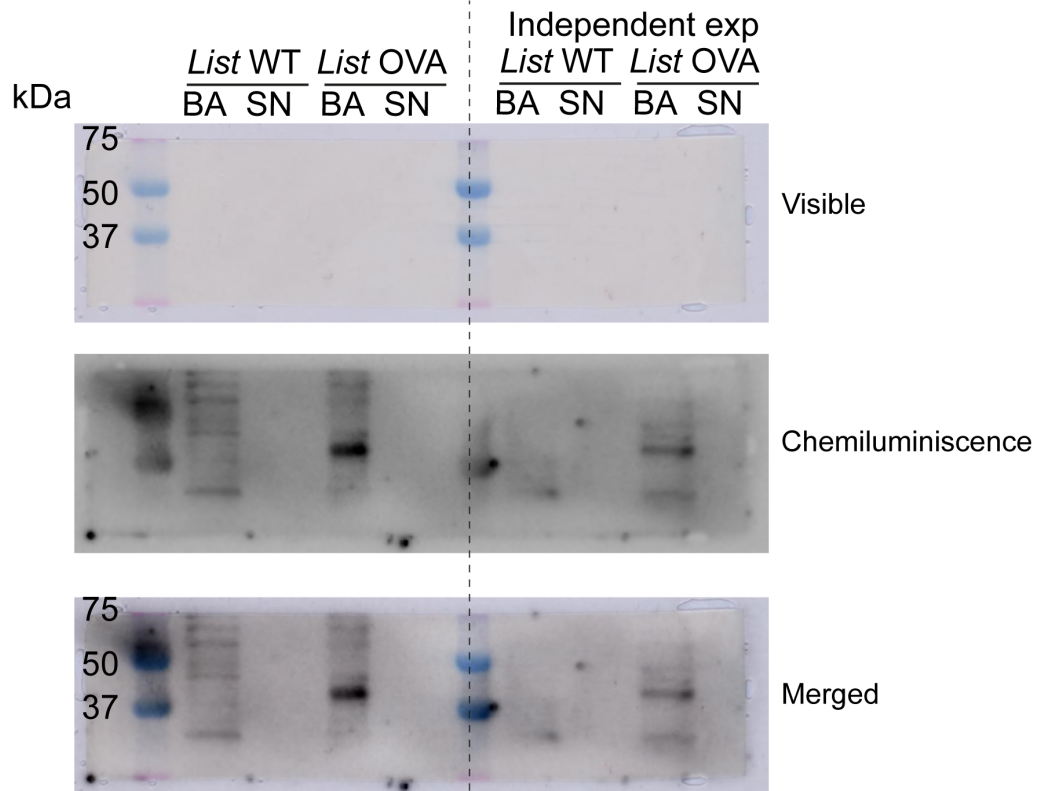

**Supplementary Figure 5. Original blots.** **A**, Original blots corresponding to Figure 2 E,F were visualized using visible light to detect the molecular size staining markers (Precision Plus Protein™ Dual Color Standards, #1610374; Bio Rad). The chemiluminescence light emission from the HRP-conjugated secondary antibodies was detected on the same membranes. Arrows indicate the molecular size markers shown in Fig. 2E,F. **B**, Original blots corresponding to Supplementary Figure 1C. Molecular size staining markers (Precision Plus Protein™ Dual Color Standards, #1610374; Bio Rad) are shown in the “visible” panel. “Chemiluminescence” panel shows the light emission of the HRP-conjugated secondary antibodies of the same membranes. We included here, in addition, the results from another independent experiment analysed in the same membrane. These last images were acquired using an *Amersham Imager 600* from *GE Health Care Life Sciences*, that allowed us to mount a merged image fusing the visible and the chemiluminescence images.
