# Supplementary material for: Conventional CD4+ T cells present bacterial antigens to induce cytotoxic and memory CD8+ T cell responses
Source: PubMed Central journal article supplement (PMC5691066; doi:10.1038/s41467-017-01661-7), 2017-11-17
Supplement: 41467_2017_1661_MOESM3_ESM.pdf [file 41467_2017_1661_MOESM3_ESM.pdf]

## **Description of Additional Supplementary Files**

File Name: Supplementary Movie 1

Description: Three-dimensional rendering of confocal images showing an IS formed by a *Listeria*OVA tpCD4+ T cell and a naïve CD8+ T cell from an OT-I mouse. The naïve CD8+ T cell is shown in grey and actin in cyan.
